# Supplementary material for: Insights into the Transcriptional Architecture of Behavioral Plasticity in the Honey Bee Apis mellifera
Source: PubMed Central journal article supplement (PMC4466890; doi:10.1038/srep11136), 2015-06-15
Supplement: srep11136-s1.pdf [file srep11136-s1.pdf]

## **Supplementary Materials**

for

### **“Insights into the Transcriptional Architecture of Behavioral Plasticity in the Honey Bee *Apis mellifera*”**

Abdullah M Khamis<sup>1\*</sup>, Adam R Hamilton<sup>2\*</sup>, Yulia A Medvedeva<sup>1&</sup>, Tanvir Alam<sup>1</sup>, Intikhab Alam<sup>1</sup>,  
Magbubah Essack<sup>1</sup>, Boris Umylny<sup>3</sup>, Boris R. Jankovic<sup>1</sup>, Nicholas L. Naeger<sup>2</sup>, Makoto Suzuki<sup>4</sup>,  
Matthias Harbers<sup>4,5#</sup>, Gene E. Robinson<sup>2#</sup>, Vladimir B Bajic<sup>1#</sup>

## Supplementary Figures

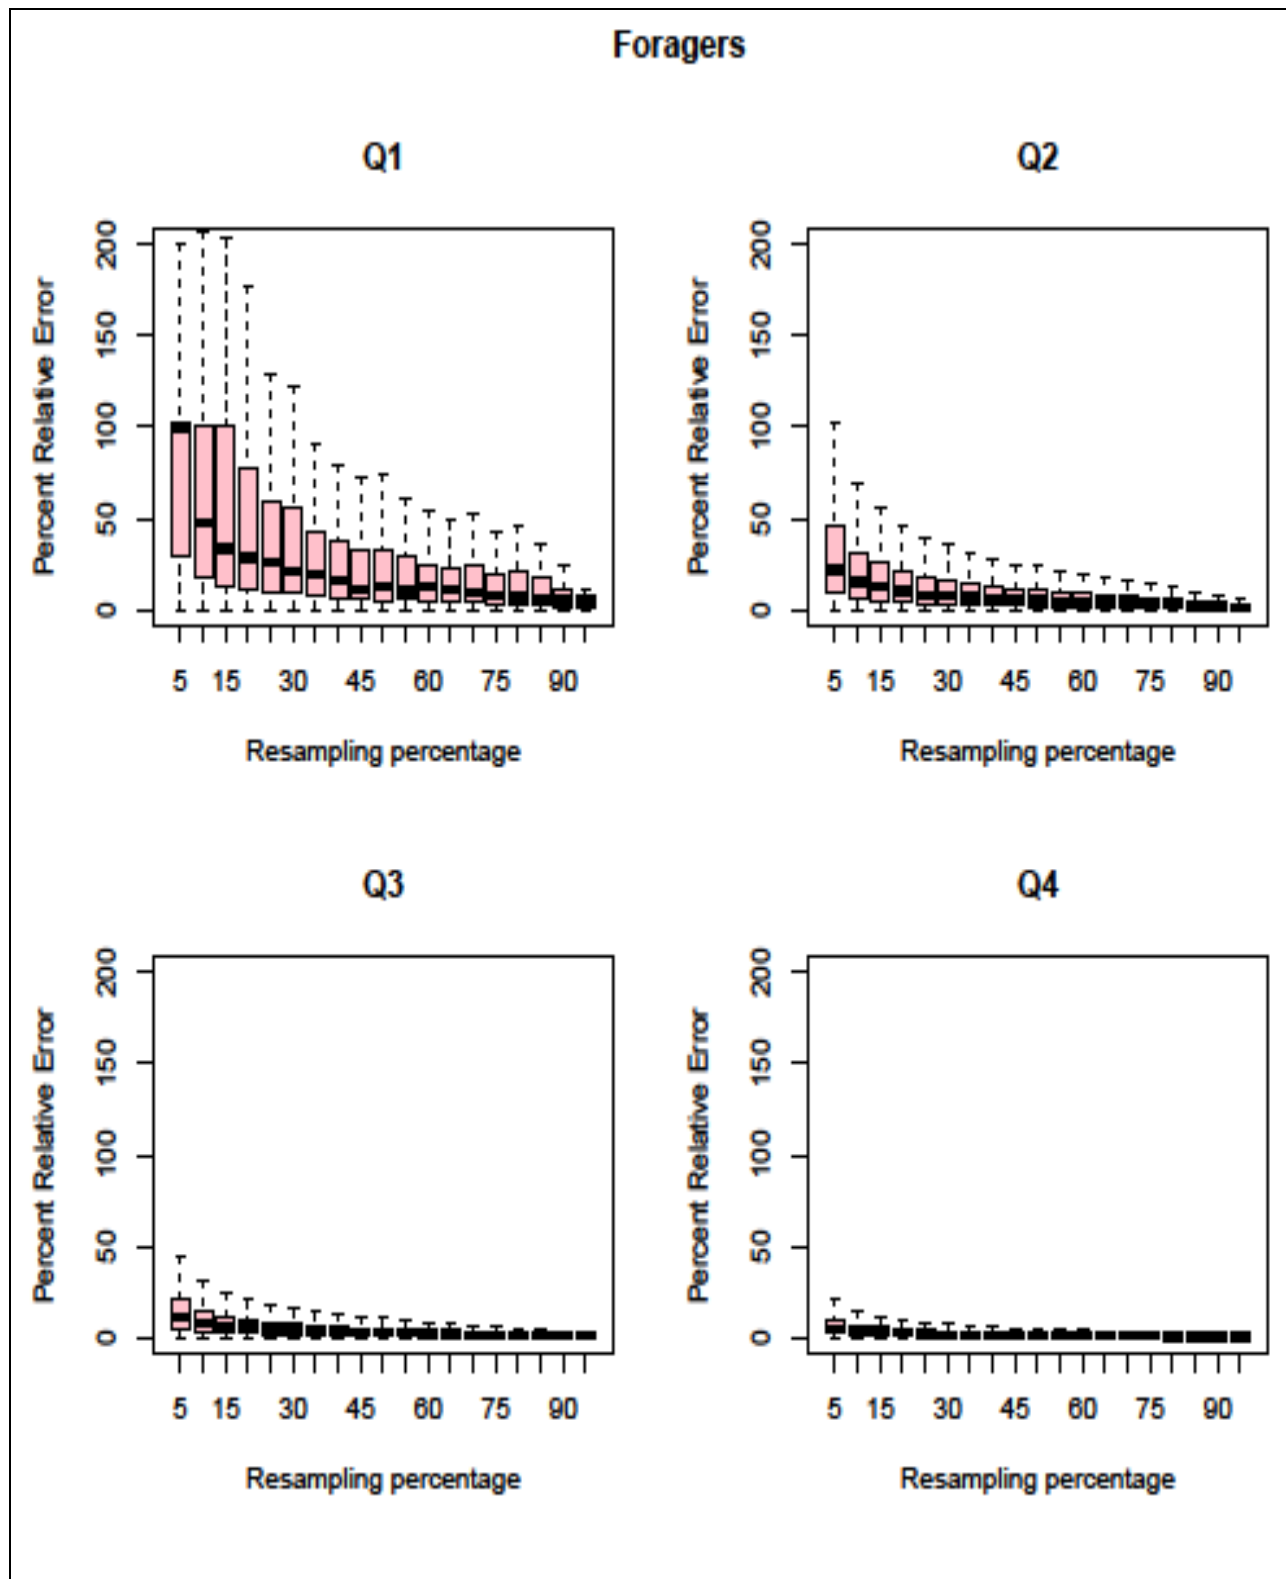

# Nurses

## Q1

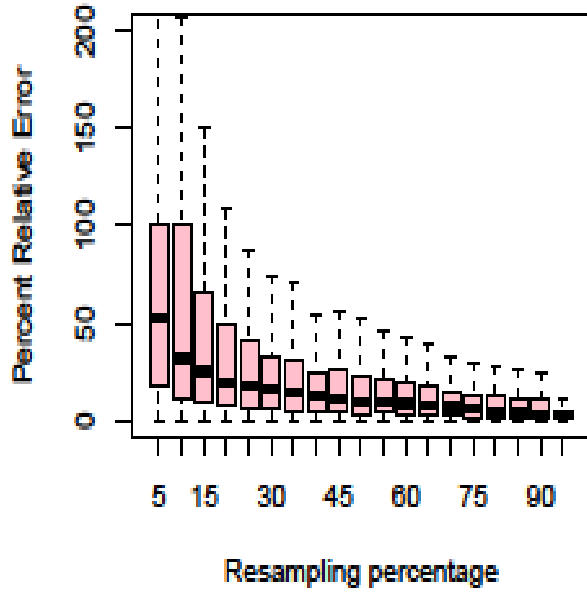

## Q2

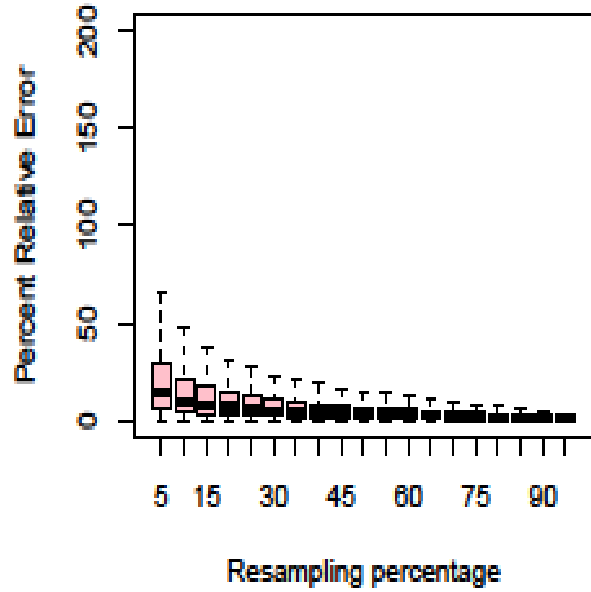

## Q3

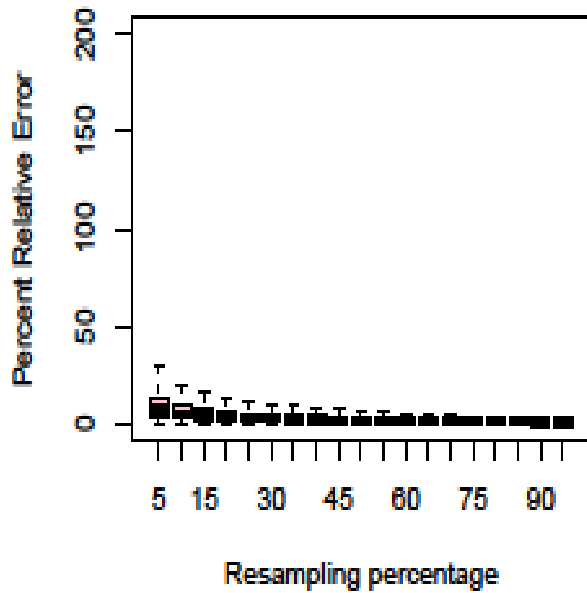

## Q4

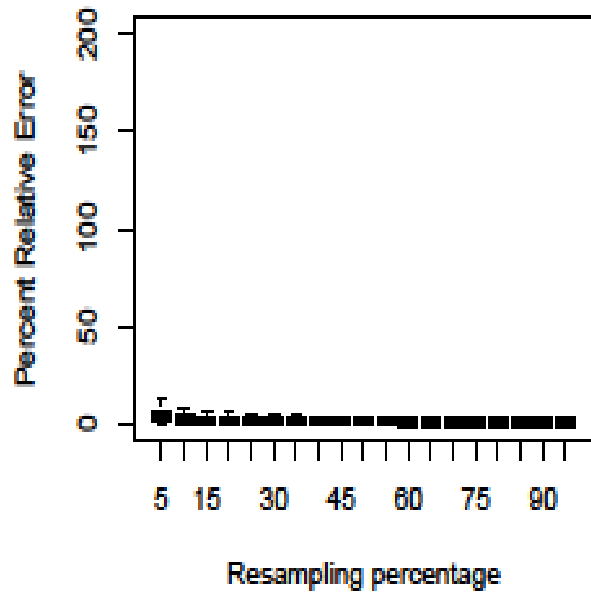

**Figure S1.** Coverage depth saturation curve for all genes with detectable levels of expression in nurses and foragers. RSeQC calculates the relative error for each gene using specified proportions (subsets) of the reads assigned to that gene. These subsets are represented in the x-axis, while the y-axis shows how the estimated distribution of the resampled data deviates from real expression values. The subplots are divided based on the level of expression of their constituent genes (Q1 – lowest 25%, Q4 – highest 25%). Regardless of the level of expression, the percent relative error converges on a stable and accurate representation of the true data, indicating that the read coverage was adequate for differential expression analyses.

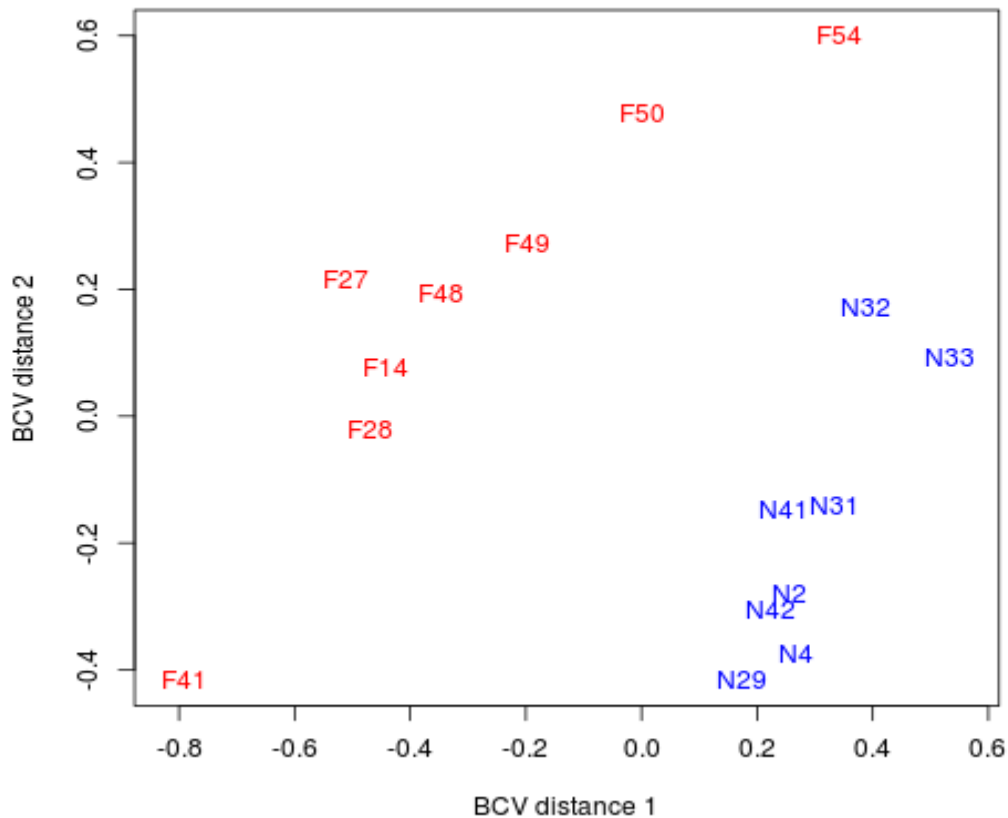

**Figure S2.** Multidimensional Scaling (MDS) plot of gene expression profiles for all samples shows a higher degree of variation within forager samples than within nurse samples. The distance on the plot between each pair of samples represents the biological coefficient of variation BCV (the square root of the dispersion parameter under the negative binomial distribution for the 500 genes with the largest absolute log-fold-changes of expression between samples).

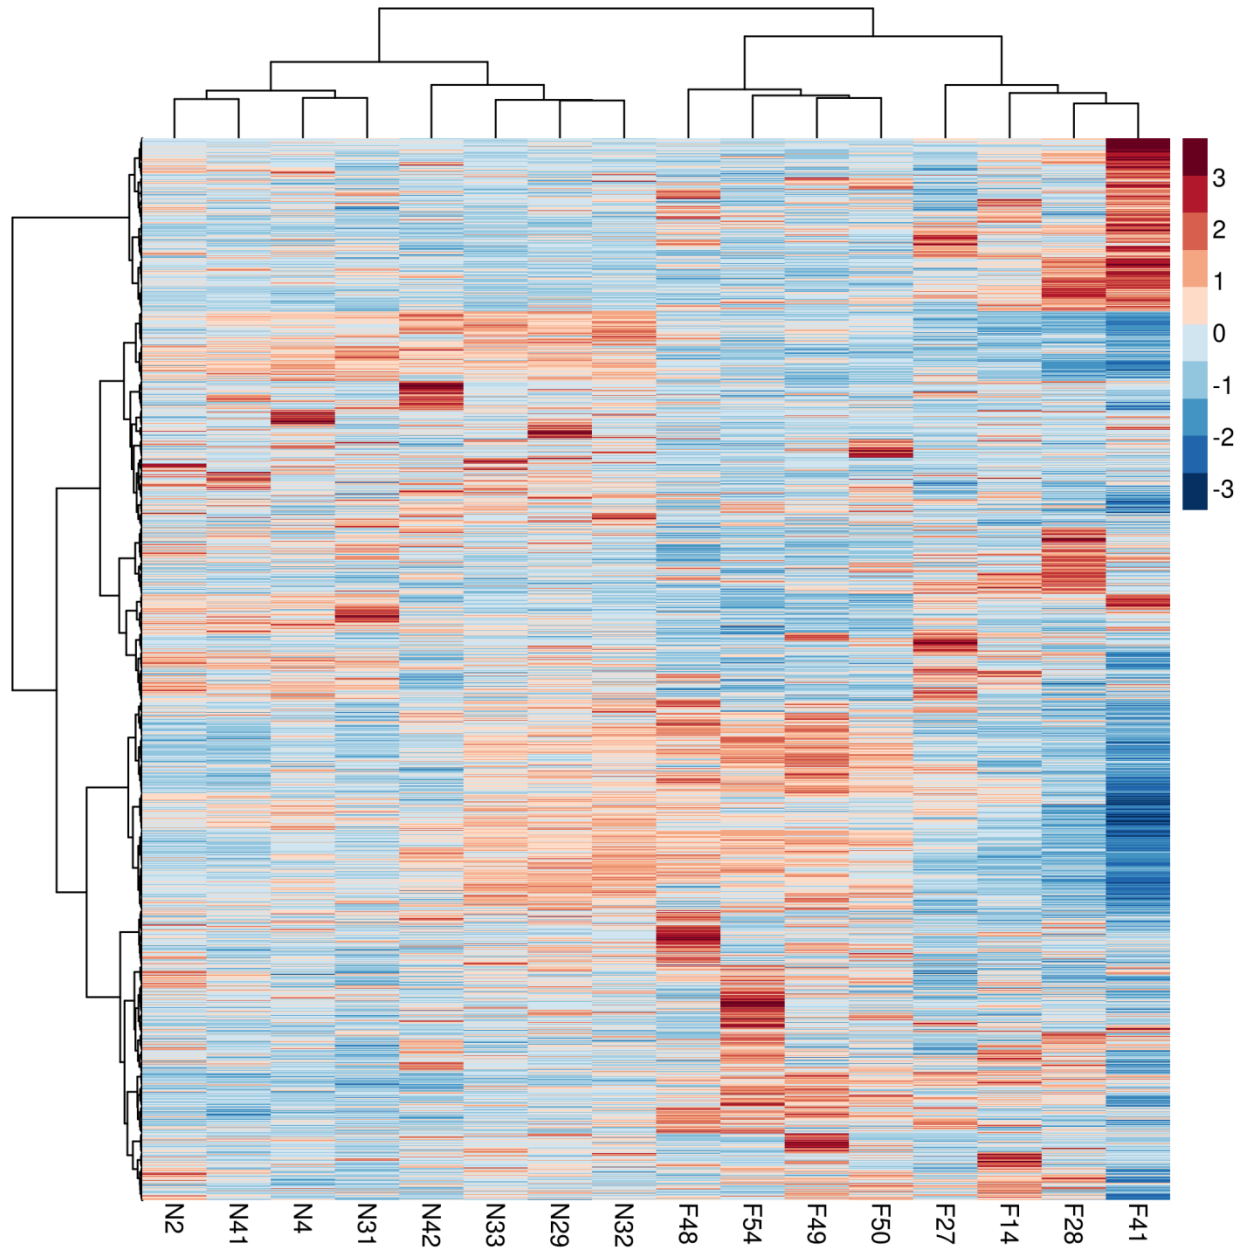

**Figure S3.** Heatmap for the hierarchical clustering of the gene expression profiles of 16 honey bees. Rows correspond to the 12,453 genes with detectable levels of expression. Columns represent samples. The clustering identified two separate groups of transcription profiles, supporting the clear distinction between the two age-related behavioral groups, nurses and foragers.

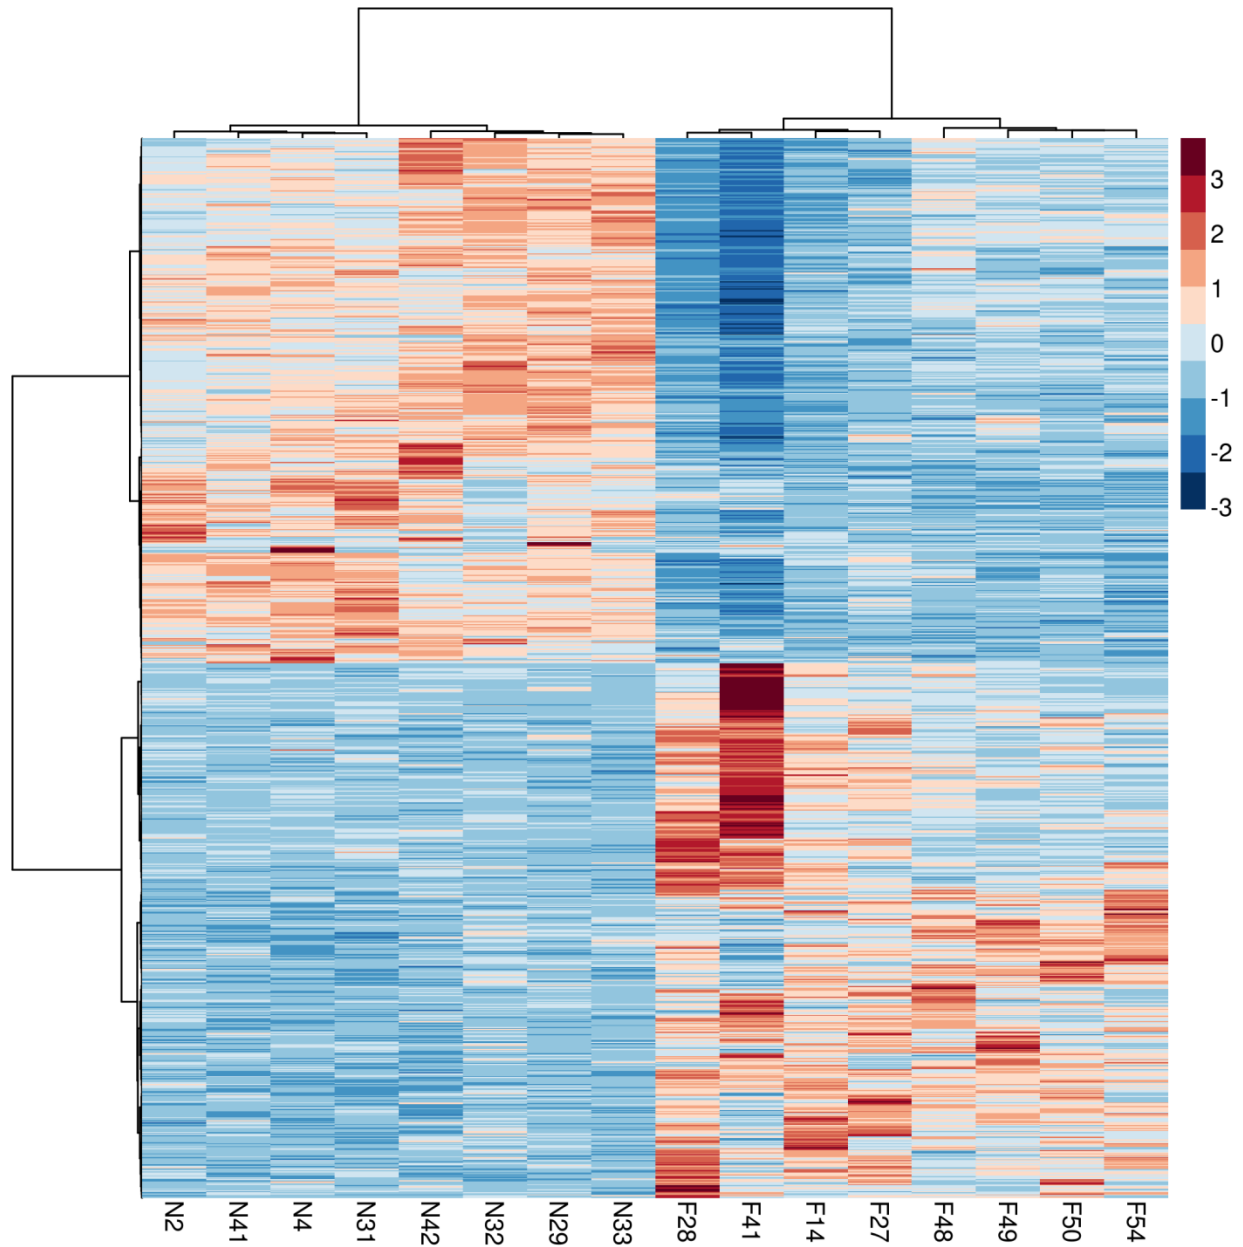

**Figure S4.** Heatmap for the hierarchical clustering of the gene expression profiles of 16 honey bees. Rows correspond to the 1,058 DEGs and columns represent samples. The clustering shows a clear separation in gene expression pattern between nurses and foragers.

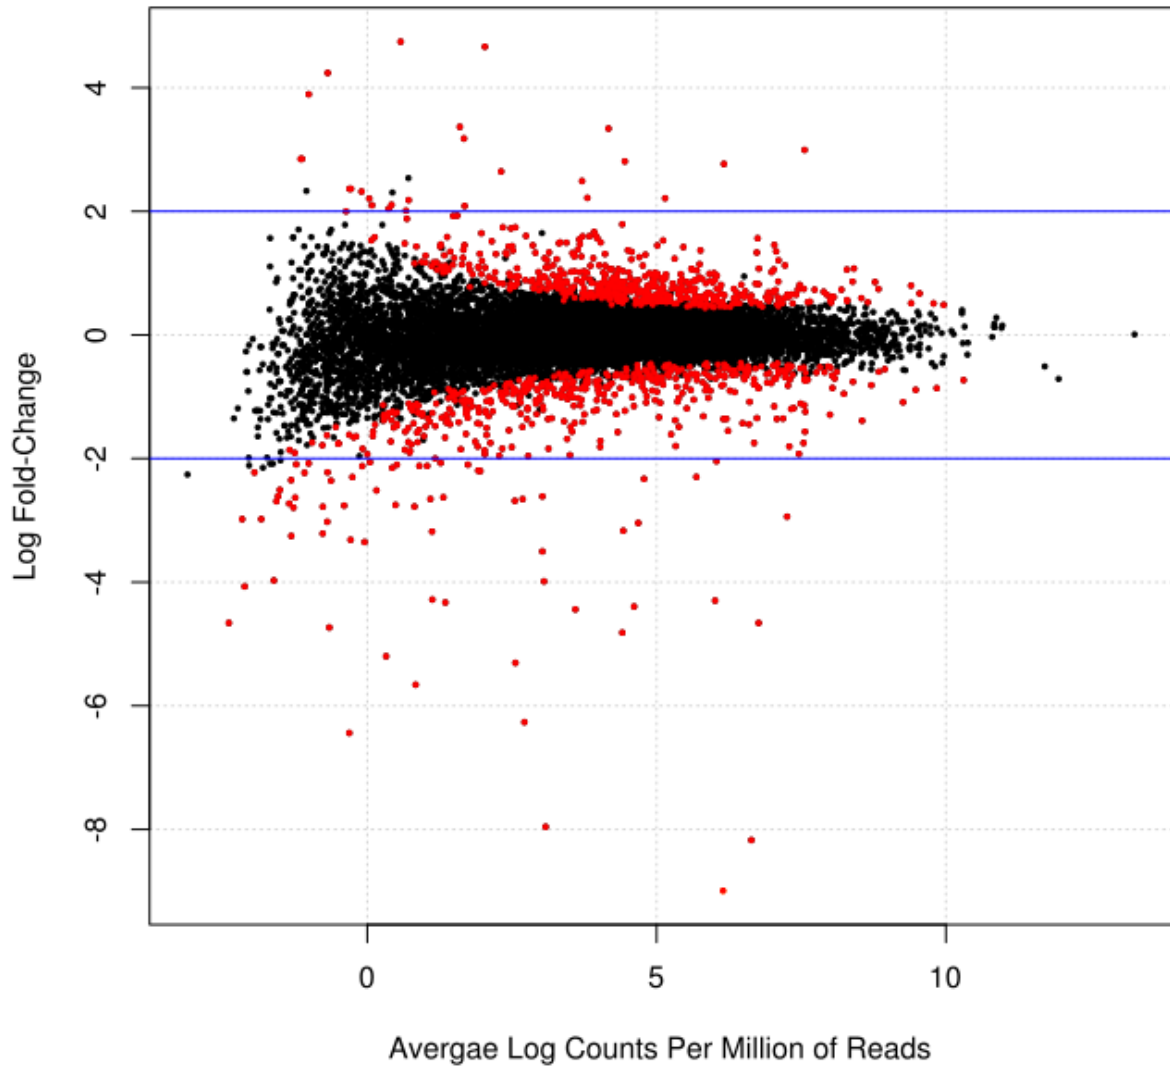

**Figure S5.** Plot showing the relationship between differential gene expression and read coverage. Differentially expressed genes (FDR<0.05) are in red and non-differentially expressed genes are in black. The two horizontal blue lines show 4-fold changes (log-FC of 2).

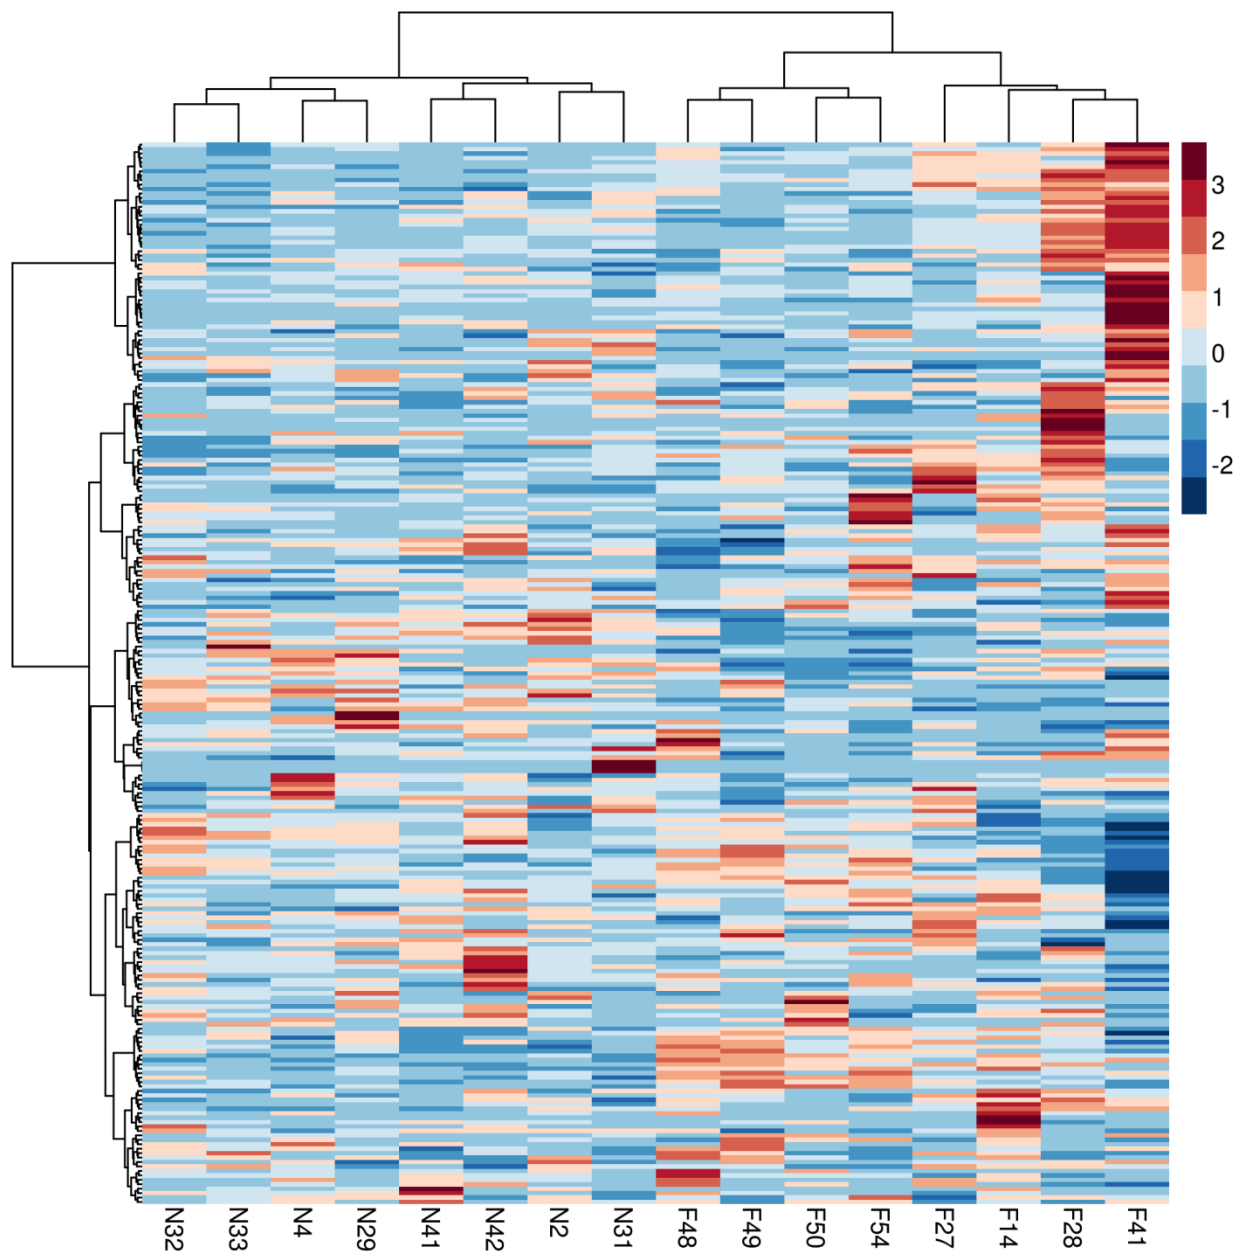

**Figure S6.** Heatmap for the hierarchical clustering of the expression data of the 239 honey bee TFs with detectable levels of brain expression. Rows represent the 239 TF genes and columns represent nurse (labeled ‘N’) and forager (labeled ‘F’) samples.



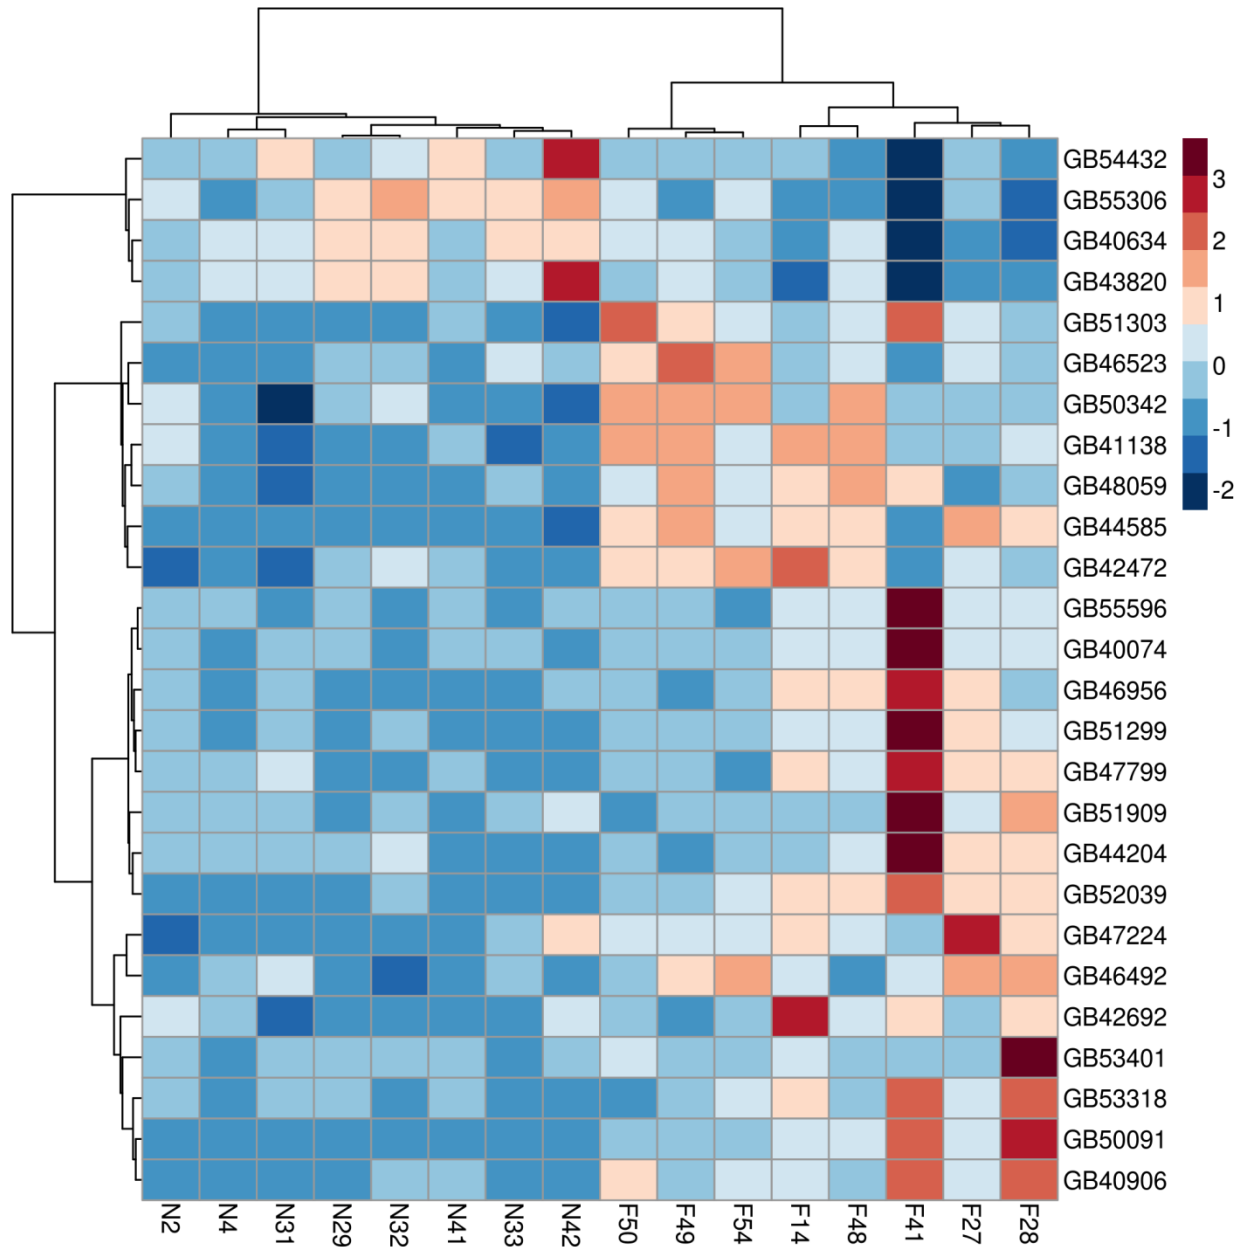

**Figure S7.** Heatmap for the hierarchical clustering of the expression data of 26 differentially expressed honey bee *Apis mellifera* TF genes. 22 TF genes are upregulated in foragers, and 4 TF genes are upregulated in nurses. Rows represent the 26 TF genes. Columns represent nurse ('N') and forager ('F') samples.

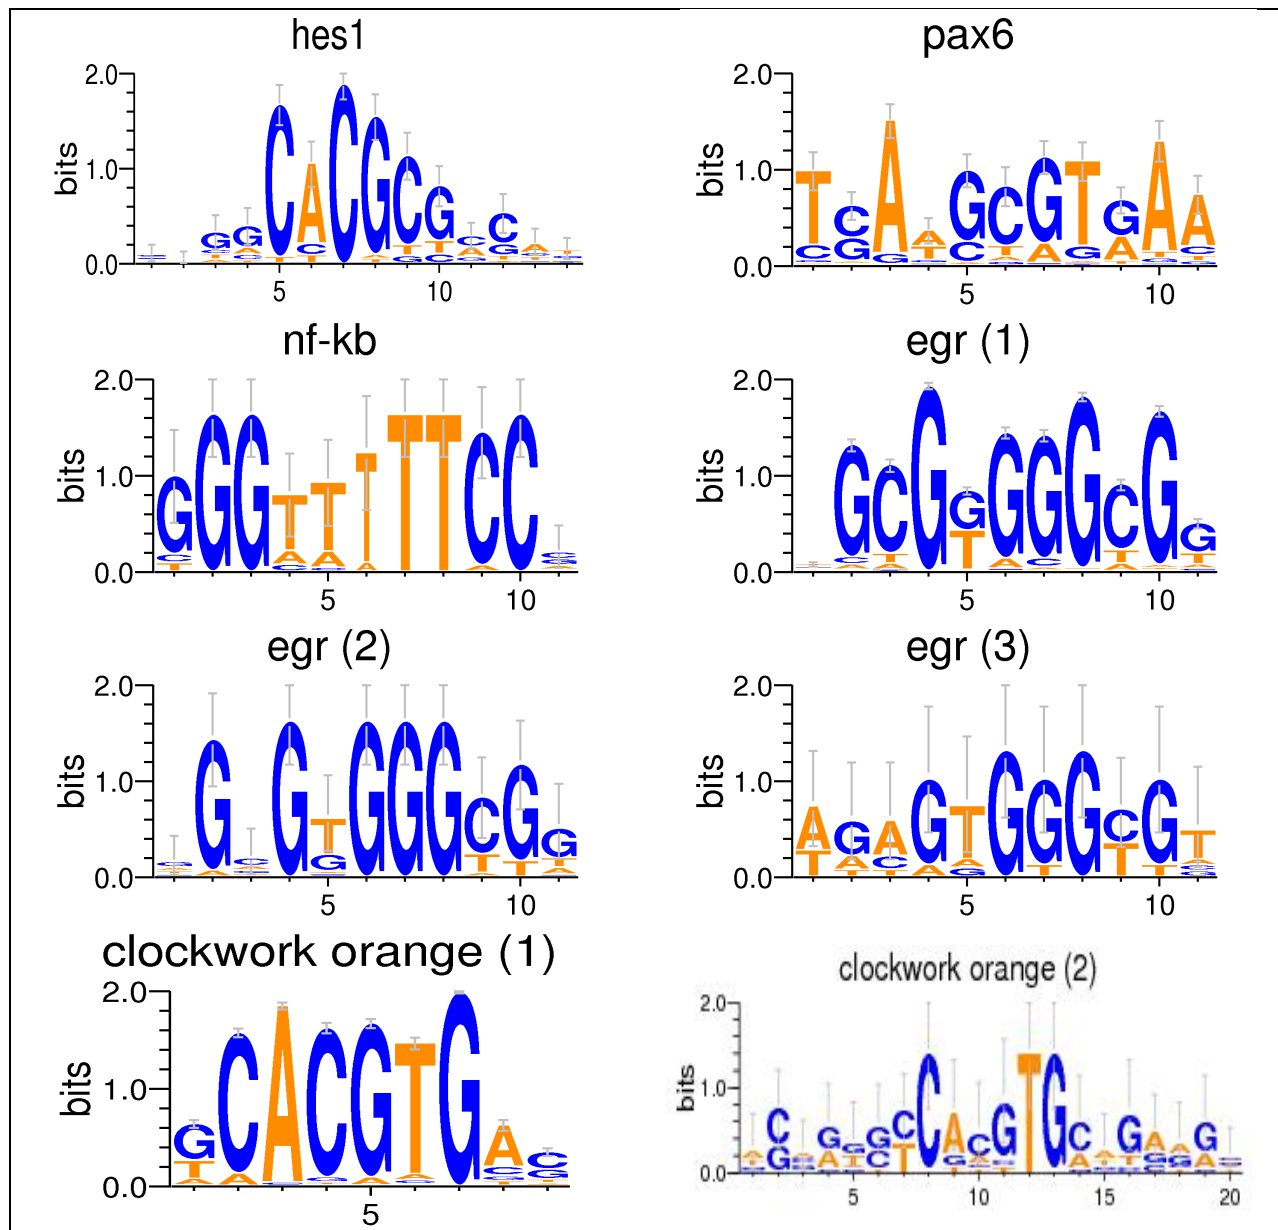

**Figure S8.** Sequence logos for the position weight matrix (PWM) of the five TFs (*hes1*, *pax6*, *nf-kb*, *egr* and *clockwork orange*) predicted to co-regulate nearly half of all forager upregulated genes. The TFs *egr* and *clockwork orange* have three and two PWMs, respectively. As shown the motifs of many of these TFs are G/C rich.

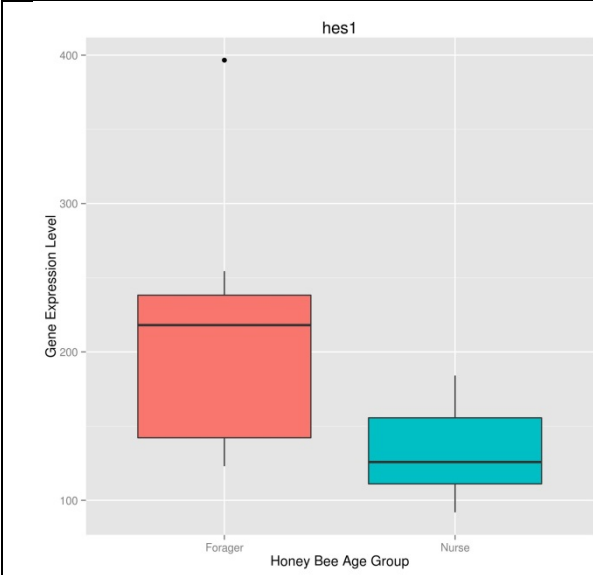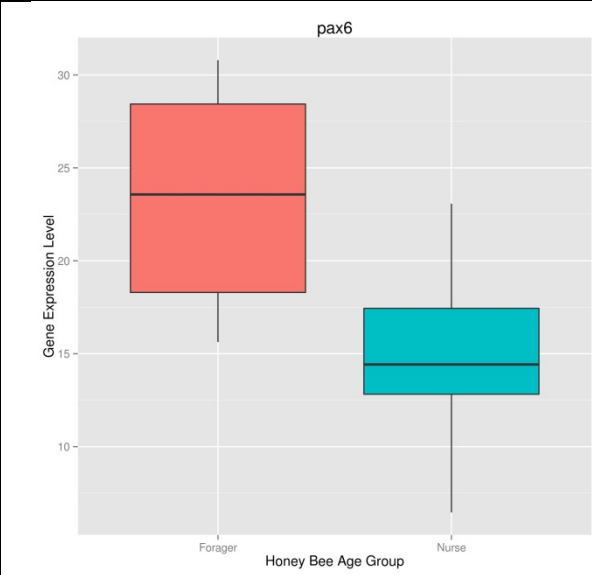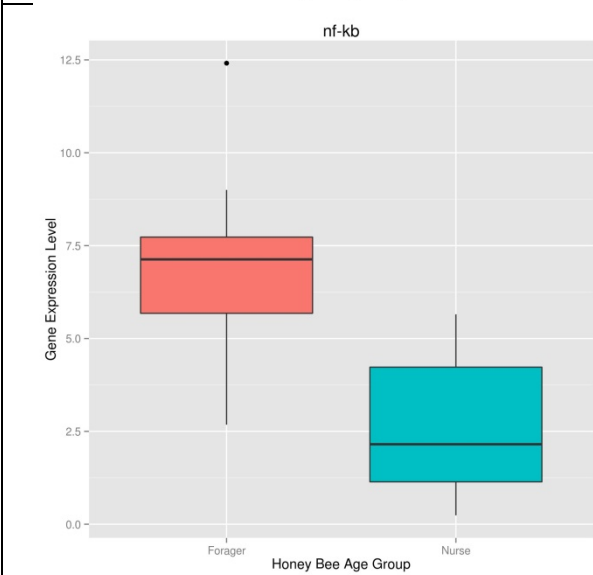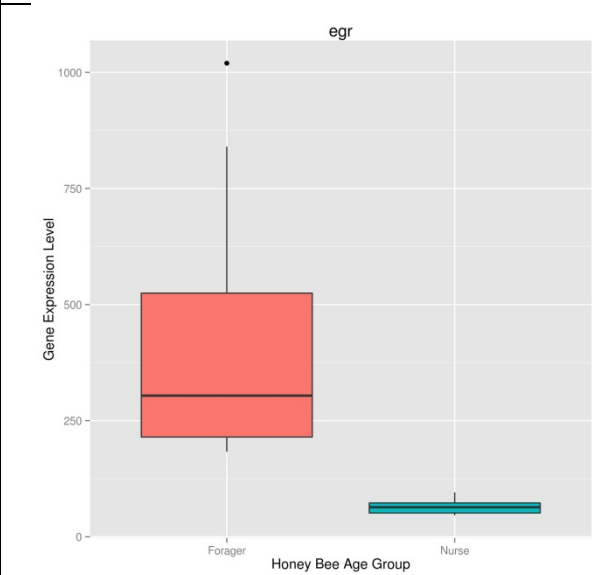

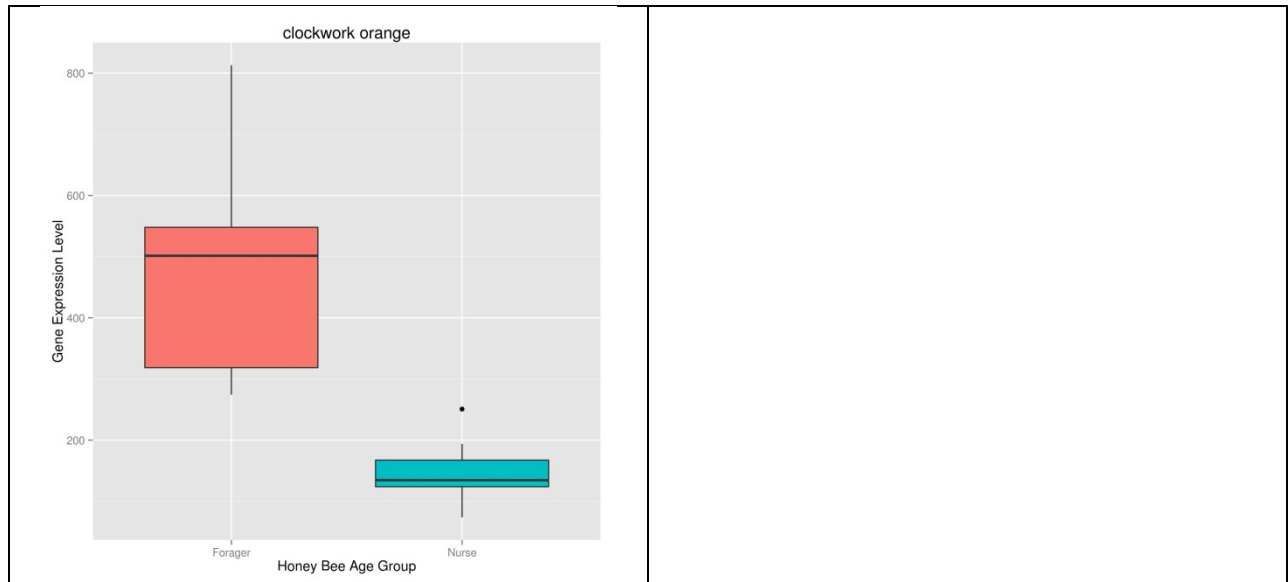

**Figure S9.** Boxplots for the expression levels of the five TFs (*hes1*, *pax6*, *nf-kb*, *egr* and *clockwork orange*) predicted to co-regulate nearly half of the forager upregulated genes.

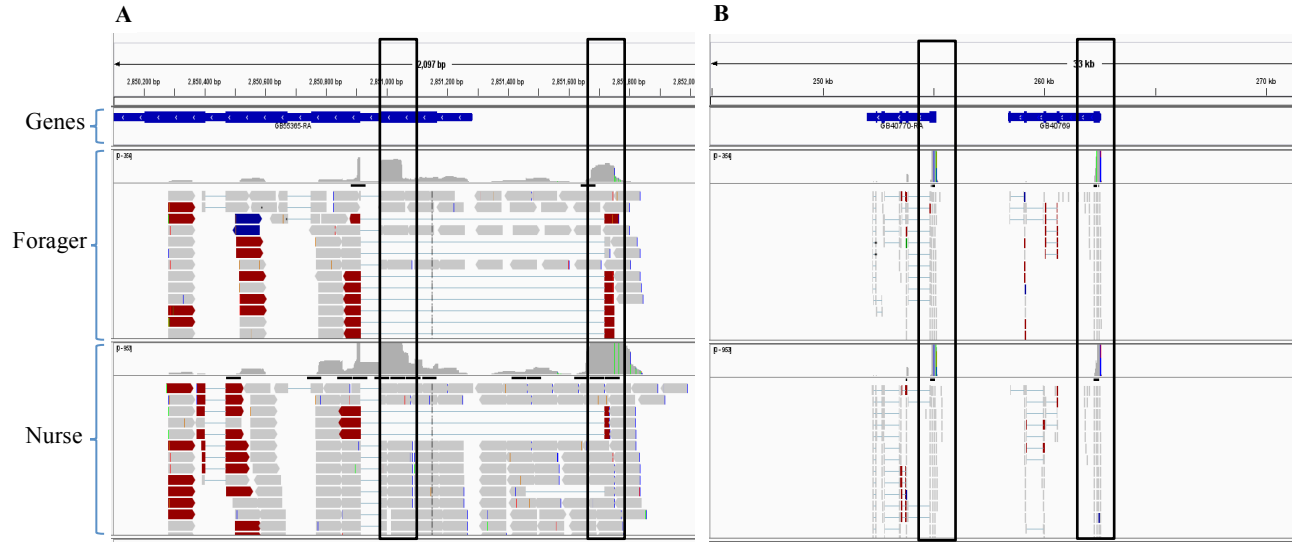

**Figure S10.** Identification of gene TSSs and related promoters. CAGE paired-end reads were mapped to the reference genome and viewed in reference to the newest honey bee gene annotation (OGS v3.2) to provide accurate identification of gene TSSs and related promoters. We identified different types of transcription start sites (TSS) based on the number of TSSs. Some genes have multiple TSSs (A) (gene ID: GB55365) while other genes use single TSSs (B) (gene IDs: GB40769 and GB40770).

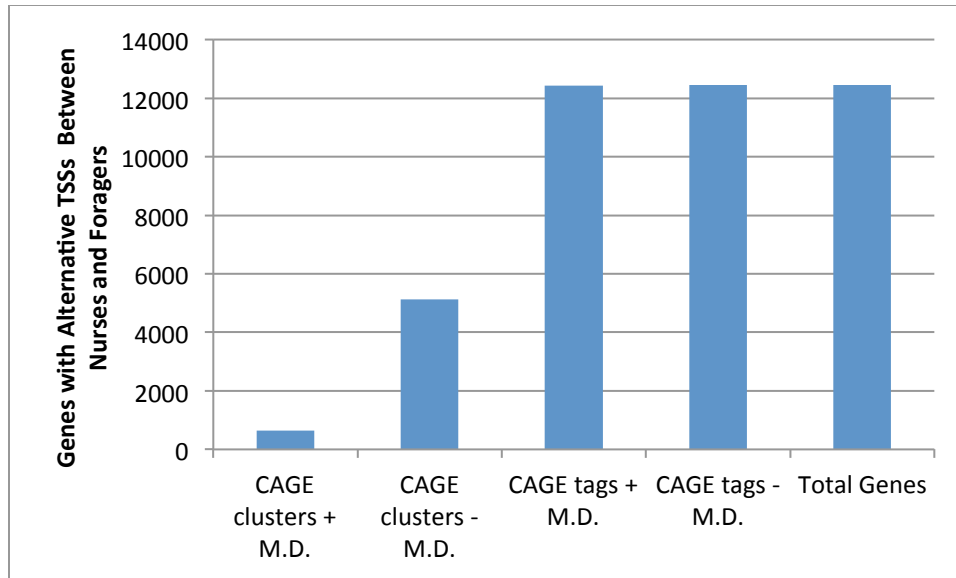

**Figure S11.** Effect of analysis technique on alternative TSS identification. Displays the influence of analysis technique on the identification of genes with alternative TSSs, using CAGE clusters vs. individual tags and with or without requiring a mutual distance (M.D.) of 100 bp.

## Supplementary Tables

**Table S1:**

A) Relationship between RNA quality and CAGEscan reads.

| Sample Name | 260/230 | 260/280 | Conc. (ng/μl) | Yield (ng) | RIN value | CAGEscan Reads |
|-------------|---------|---------|---------------|------------|-----------|----------------|
| N2          | 1.48    | 2.05    | 31            | 1540       | 5.5       | 14,172,924     |
| N4          | 0.91    | 2.07    | 43            | 2126       | 5.3       | 12,209,666     |
| N29         | 1.47    | 2.08    | 29            | 1458       | 4.2       | 10,652,219     |
| N31         | 1.87    | 1.98    | 35            | 1746       | 5.5       | 10,424,626     |
| N32         | 0.42    | 1.88    | 27            | 1342       | 3.8       | 11,031,651     |
| N33         | 0.61    | 2.11    | 30            | 1506       | 4.5       | 10,998,419     |
| N41         | 1.70    | 1.96    | 37            | 1826       | 5.5       | 12,987,132     |
| N42         | 0.34    | 2.06    | 36            | 1786       | 6.7       | 10,126,459     |
| F14         | 0.56    | 1.89    | 30            | 1510       | 6.0       | 5,449,888      |
| F27         | 0.77    | 1.85    | 34            | 1690       | 6.4       | 3,586,235      |
| F28         | 0.58    | 1.69    | 27            | 1348       | 6.9       | 7,725,895      |
| F41         | 0.51    | 2.14    | 28            | 1424       | 7.7       | 9,237,207      |
| F48         | 0.57    | 2.17    | 36            | 1778       | 8.0       | 2,936,239      |
| F49         | 0.47    | 2.28    | 37            | 1866       | 5.8       | 4,355,366      |
| F50         | 1.16    | 2.28    | 33            | 1652       | 7.6       | 4,307,121      |
| F54         | 0.45    | 2.46    | 34            | 1710       | 5.8       | 2,348,738      |

This table depicts the Nanodrop quality scores, RNA concentration/total quantity, and Bioanalyzer RIN values of each sample used for CAGEscan. Although there is a high degree of variability in RIN score between individual samples, it is unlikely that this reflects RNA degradation that would adversely affect CAGEscan sequencing for the following reasons:

- 1) The insect 28s ribosomal subunit can dissociate at the temperatures employed by the Bioanalyzer, which can cause spurious RIN values. An examination of the Bioanalyzer electropherograms revealed that this was, in fact, the case (Supplementary Figure S1B).
- 2) If RIN score was reflective of the RNA quality in these samples, then a positive correlation should be expected to exist between RIN and sequencing/mapping efficiency. However, no such relationship was found ( $p > 0.25$ , Spearman Rank Correlation). While a modestly significant correlation was found between RIN score and the percentage of

CAGE tags successfully mapped ( $p=0.016$ ), RIN score was inversely (rather than positively) related to CAGE mapping success ( $r= -0.59$ ).

### B) Sample Bioanalyzer Trace.

Note the bimodal peak identified as the 18s rRNA (rRNA1), and the lack of a peak corresponding to the 28s rRNA. This indicates that the 28s rRNA dissociated and comigrated with the 18s rRNA. Since calculating the RIN value depends on the proper identification of these rRNAs, this disassociation would result in the RIN giving an inaccurate representation of RNA quality.

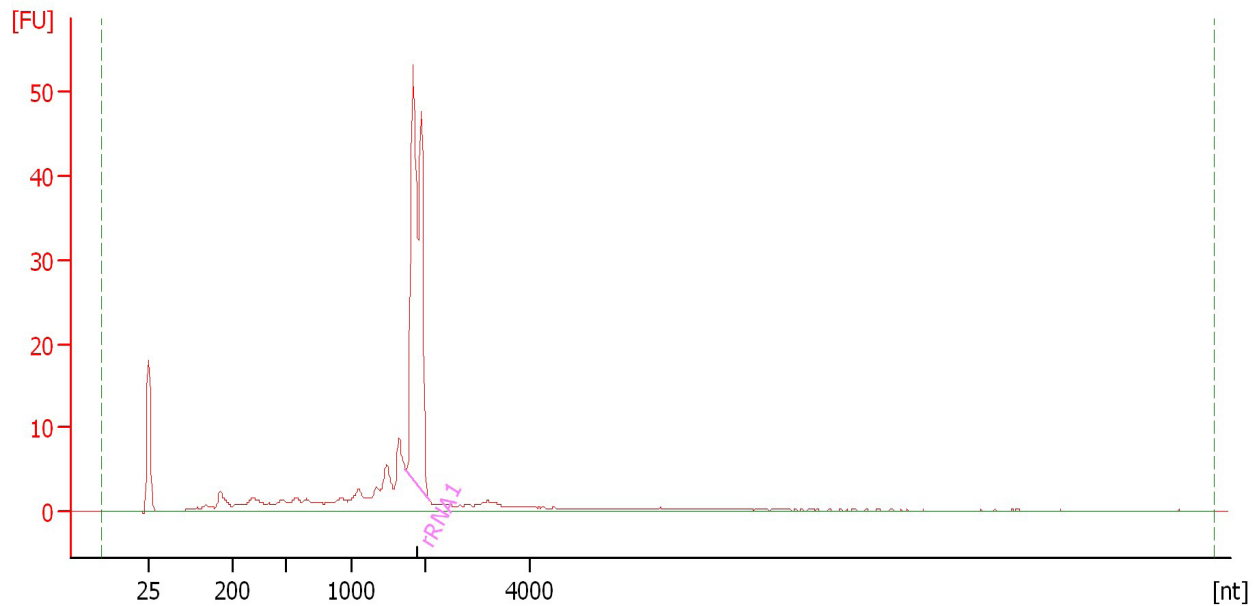

**Figure S1B.** Bioanalyzer electropherogram for honey bee RNA. The electropherogram does not indicate that any RNA degradation occurred (PMID: 21067419, PMID: 24862828).



**Table S2:**

Number of reads **obtained** for each **sequenced** sample. This table shows general information about the number of reads obtained for each sample in forager and nurse libraries.

| <b>Sample</b> | <b>Sample Name</b> | <b>NanoCAGE Library</b>   | <b>Total Number of Paired-end Reads</b> |
|---------------|--------------------|---------------------------|-----------------------------------------|
| 1             | F14                | Forager                   | 5,449,888                               |
| 2             | F27                |                           | 3,586,235                               |
| 3             | F28                |                           | 7,725,895                               |
| 4             | F41                |                           | 9,237,207                               |
| 5             | F48                |                           | 2,936,239                               |
| 6             | F49                |                           | 4,355,366                               |
| 7             | F50                |                           | 4,307,121                               |
| 8             | F54                |                           | 2,348,738                               |
|               |                    |                           | <b>Total = 39,946,689</b>               |
| 1             | N2                 | Nurse                     | 14,172,924                              |
| 2             | N4                 |                           | 12,209,666                              |
| 3             | N29                |                           | 10,652,219                              |
| 4             | N31                |                           | 10,424,626                              |
| 5             | N32                |                           | 11,031,651                              |
| 6             | N33                |                           | 10,998,419                              |
| 7             | N41                |                           | 12,987,132                              |
| 8             | N42                |                           | 10,126,459                              |
|               |                    | <b>Total = 92,603,096</b> |                                         |

**Table S3:**

Mapping statistics of library reads using Tophat. Column 3 shows the number of mapped reads obtained using Tophat when default values for the (average inner distance between mate reads of a pair of reads=20) and (standard deviation of inner distance=50) were used. Column 4 shows the number of mapped reads using Tophat when the estimated values for (average inner distance between mate reads of a pair of reads=588) and (standard deviation of inner distance=767) were used. These values were estimated as follows. We used bowtie2 to map the reads initially. Then, we estimated these values from the distances between mates of the properly mapped paired-end reads. We used these values eventually to map the reads using Tophat. The mapping ratio is shown in column 6.

Note: The values in column 3 may be greater than the original number of reads in column 2. This is because reads are not necessarily paired during the mapping process. Consequently, the number of mapped reads is calculated based on individual mates of paired-reads.

| <b>Sample</b> | <b>Total Number of Reads</b> | <b>Total Number of Mapped Reads (using default settings)</b> | <b>Total Number of Mapped Reads (using estimated distances)</b> | <b>Unique Mapped Reads</b> | <b>Mapping Ratio</b> |
|---------------|------------------------------|--------------------------------------------------------------|-----------------------------------------------------------------|----------------------------|----------------------|
| F14           | 5,449,888                    | 6,030,292                                                    | 6,134,426                                                       | 3,143,064                  | 57.67%               |
| F27           | 3,586,235                    | 4,002,757                                                    | 4,071,609                                                       | 2,157,798                  | 60.16%               |
| F28           | 7,725,895                    | 7,927,736                                                    | 8,057,070                                                       | 4,244,582                  | 54.93%               |
| F41           | 9,237,207                    | 5,895,966                                                    | 5,981,393                                                       | 3,130,408                  | 33.88%               |
| F48           | 2,936,239                    | 3,361,068                                                    | 3,416,792                                                       | 1,798,240                  | 61.24%               |
| F49           | 4,355,366                    | 5,716,008                                                    | 5,808,440                                                       | 3,040,200                  | 69.80%               |
| F50           | 4,307,121                    | 5,745,833                                                    | 5,839,990                                                       | 2,955,469                  | 68.61%               |
| F54           | 2,348,738                    | 3,021,819                                                    | 3,070,740                                                       | 1,623,527                  | 69.12%               |
| N2            | 14,172,924                   | 15,706,801                                                   | 15,967,039                                                      | 8,084,168                  | 57.03%               |
| N4            | 12,209,666                   | 13,228,888                                                   | 13,450,770                                                      | 7,068,767                  | 57.89%               |
| N29           | 10,652,219                   | 13,739,874                                                   | 13,981,602                                                      | 6,949,056                  | 65.23%               |
| N31           | 10,424,626                   | 12,889,625                                                   | 13,127,848                                                      | 6,820,778                  | 65.42%               |
| N32           | 11,031,651                   | 13,393,432                                                   | 13,621,784                                                      | 7,173,714                  | 65.02%               |
| N33           | 10,998,419                   | 14,417,662                                                   | 14,663,617                                                      | 7,503,984                  | 68.22%               |
| N41           | 12,987,132                   | 15,571,634                                                   | 15,821,593                                                      | 8,050,612                  | 61.98%               |
| N42           | 10,126,459                   | 12,105,027                                                   | 12,305,292                                                      | 6,529,766                  | 64.48%               |

**Table S4:**

Filtration results on the mapped reads based on quality threshold, mapping both mates of paired-end reads and insertion size. We applied some filtration methods to maintain mapped reads having good mapping quality and were properly paired and within considerable distance between the mates of the pair. First three columns are identical to columns 1, 2 and 4, respectively, of Supplementary Table S3.

Columns Description:

**Column1 (Sample):** Sample Name

**Column2 (Total Number of Paired-End Reads):** The original total number of paired end reads we have

**Column3 (Total Number of Mapped Reads):** The total number of reads mapped by Tophat. The number of mapped reads is calculated based on individual mates of paired-reads because reads are not necessarily paired during the mapping process. For this reason, the numbers in this column may be greater than the original number of reads in column 2.

**Column4 (Mapped Reads with Good Mapping Quality):** The total number of mapped reads which passed the quality threshold (20)

**Column5 (Correctly Mapped Reads):** The total number mapped reads which passed the quality threshold (20) and were properly paired during mapping (an example of the incorrect mapped read is when mates are mapped in the wrong direction)

**Column6 (Within Insertion Size 1513):** The total number mapped reads which passed the quality threshold (20) and were properly paired during mapping and have insertion size <1513

**Column 7 (Unique Mapped Reads):** The unique number of mapped reads in column 6

| Sample | Total Number of Paired-End Reads | Total Number of Mapped Reads | Mapped Reads with Good Mapping Quality | Correctly Mapped Reads | Within Insertion Size (1513) * | Unique Mapped Reads |
|--------|----------------------------------|------------------------------|----------------------------------------|------------------------|--------------------------------|---------------------|
| F14    | 5,449,888                        | 6,134,426                    | 5,235,317                              | 4,132,273              | 3,321,089                      | 1,661,003           |
| F27    | 3,586,235                        | 4,071,609                    | 3,643,431                              | 2,886,570              | 2,321,172                      | 1,160,788           |
| F28    | 7,725,895                        | 8,057,070                    | 7,043,813                              | 5,571,558              | 4,507,082                      | 2,254,095           |
| F41    | 9,237,207                        | 5,981,393                    | 5,008,184                              | 3,757,953              | 3,204,608                      | 1,602,772           |
| F48    | 2,936,239                        | 3,416,792                    | 3,029,380                              | 2,367,407              | 1,914,907                      | 957,521             |
| F49    | 4,355,366                        | 5,808,440                    | 5,155,830                              | 4,120,182              | 3,290,889                      | 1,645,762           |
| F50    | 4,307,121                        | 5,839,990                    | 5,001,987                              | 3,976,839              | 3,151,237                      | 1,575,704           |
| F54    | 2,348,738                        | 3,070,740                    | 2,741,950                              | 2,152,211              | 1,717,604                      | 858,840             |
| N2     | 14,172,924                       | 15,967,039                   | 13,470,127                             | 10,603,418             | 8,192,48q7                     | 4,096,705           |
| N4     | 12,209,666                       | 13,450,770                   | 11,815,466                             | 9,345,058              | 7,329,738                      | 3,665,374           |
| N29    | 10,652,219                       | 13,981,602                   | 11,670,196                             | 9,301,672              | 7,308,576                      | 3,654,964           |

|     |            |            |            |            |           |           |
|-----|------------|------------|------------|------------|-----------|-----------|
| N31 | 10,424,626 | 13,127,848 | 11,581,843 | 9,301,324  | 7,174,563 | 3,587,528 |
| N32 | 11,031,651 | 13,621,784 | 11,967,574 | 9,366,077  | 7,295,335 | 3,648,373 |
| N33 | 10,998,419 | 14,663,617 | 12,600,241 | 9,984,766  | 7,710,155 | 3,855,377 |
| N41 | 12,987,132 | 15,821,593 | 13,401,785 | 10,486,051 | 8,014,535 | 4,007,666 |
| N42 | 10,126,459 | 12,305,292 | 10,788,376 | 8,302,999  | 6,482,828 | 3,241,663 |

\*1513 is the template length which is:

(Average insertion size+ standard deviation + paired read lengths)

i.e.  $(588 + 767 + 79 * 2) = 1513$

**Table S5:**

Statistics of the association between CAGE tags and OGS v3.2 genes.

| Sample         | Total CAGE Tags in <i>(Positive)</i> Strand | CAGE Tags in <i>(Positive)</i> Strand which could be Associated to Genes | Percentage of CAGE Tags Associated to Genes to the Total CAGE Tags in <i>(Positive)</i> Strand | Total CAGE Tags in <i>(Negative)</i> Strand | CAGE Tags in <i>(Negative)</i> Strand which could be Associated to Genes | Percentage of CAGE Tags Associated to Genes to the Total CAGE Tags in <i>(Negative)</i> Strand | Percentage of CAGE Tags Associated to Genes to the Total CAGE Tags in <i>(Both Strands)</i> |
|----------------|---------------------------------------------|--------------------------------------------------------------------------|------------------------------------------------------------------------------------------------|---------------------------------------------|--------------------------------------------------------------------------|------------------------------------------------------------------------------------------------|---------------------------------------------------------------------------------------------|
| <b>Forager</b> |                                             |                                                                          |                                                                                                |                                             |                                                                          |                                                                                                |                                                                                             |
| F14            | 744,521                                     | 636,437                                                                  | 85.48%                                                                                         | 616,553                                     | 552,489                                                                  | 89.60%                                                                                         | 87.35%                                                                                      |
| F27            | 516,490                                     | 448,612                                                                  | 86.85%                                                                                         | 429,271                                     | 394,422                                                                  | 91.88%                                                                                         | 89.14%                                                                                      |
| F28            | 998,448                                     | 812,140                                                                  | 81.34%                                                                                         | 795,356                                     | 718,421                                                                  | 90.32%                                                                                         | 85.32%                                                                                      |
| F41            | 704,367                                     | 557,640                                                                  | 79.16%                                                                                         | 534,496                                     | 466,164                                                                  | 87.21%                                                                                         | 82.64%                                                                                      |
| F48            | 425,089                                     | 372,402                                                                  | 87.60%                                                                                         | 369,030                                     | 334,903                                                                  | 90.75%                                                                                         | 89.07%                                                                                      |
| F49            | 729,469                                     | 641,975                                                                  | 88.00%                                                                                         | 634,005                                     | 578,035                                                                  | 91.17%                                                                                         | 89.48%                                                                                      |
| F50            | 695,749                                     | 601,638                                                                  | 86.47%                                                                                         | 609,247                                     | 553,558                                                                  | 90.85%                                                                                         | 88.52%                                                                                      |
| F54            | 381,211                                     | 330,342                                                                  | 86.65%                                                                                         | 336,965                                     | 305,528                                                                  | 90.67%                                                                                         | 88.54%                                                                                      |
| <b>Nurse</b>   |                                             |                                                                          |                                                                                                |                                             |                                                                          |                                                                                                |                                                                                             |
| N2             | 1,801,355                                   | 1,553,886                                                                | 86.26%                                                                                         | 1,540,413                                   | 1,394,063                                                                | 90.49%                                                                                         | 88.22%                                                                                      |
| N4             | 1,602,326                                   | 1,385,226                                                                | 86.45%                                                                                         | 1,345,999                                   | 1,234,192                                                                | 91.69%                                                                                         | 88.84%                                                                                      |
| N29            | 1,586,950                                   | 1,382,406                                                                | 87.11%                                                                                         | 1,362,343                                   | 1,249,877                                                                | 91.74%                                                                                         | 89.25%                                                                                      |
| N31            | 1,549,518                                   | 1,323,682                                                                | 85.42%                                                                                         | 1,280,533                                   | 1,190,560                                                                | 92.97%                                                                                         | 88.84%                                                                                      |
| N32            | 1,597,414                                   | 1,399,339                                                                | 87.60%                                                                                         | 1,397,086                                   | 1,283,929                                                                | 91.90%                                                                                         | 89.61%                                                                                      |
| N33            | 1,677,454                                   | 1,468,739                                                                | 87.55%                                                                                         | 1,464,781                                   | 1,343,610                                                                | 91.72%                                                                                         | 89.50%                                                                                      |
| N41            | 1,746,244                                   | 1,503,673                                                                | 86.10%                                                                                         | 1,478,731                                   | 1,350,915                                                                | 91.35%                                                                                         | 88.52%                                                                                      |
| N42            | 1,384,485                                   | 1,176,963                                                                | 85.01%                                                                                         | 1,200,185                                   | 1,100,572                                                                | 91.70%                                                                                         | 88.12%                                                                                      |

**Table S6:**

Comparison of Major Findings with/Without the Outlier F41

|                     | Forager Upregulated Genes | Nurse Upregulated Genes | Forager Upregulated TFs | Nurse Upregulated TFs | Key Regulators |
|---------------------|---------------------------|-------------------------|-------------------------|-----------------------|----------------|
| With Sample F41     | 534                       | 524                     | 22                      | 4                     | 5              |
| Without Sample F41  | 520                       | 660                     | 18                      | 3                     | 5              |
| Percent Concordance | 77.7%                     | 95.2%                   | 82%                     | 75%                   | 100%           |

Removing the outlier F41 had little impact on subsequent analyses.

**Table S7:**

Assessing Potential Hypopharyngeal Gland Contamination of Gene Expression

| Nurse HPG vs Nurse Brain |                              |                       |                      | Forager HPG vs Forager Brain |                              |                       |                      |
|--------------------------|------------------------------|-----------------------|----------------------|------------------------------|------------------------------|-----------------------|----------------------|
| Top                      | Log <sub>2</sub> Fold Change | HPG Upregulated Genes | CAGEscan DEG Overlap | Top3                         | Log <sub>2</sub> Fold Change | HPG Upregulated Genes | CAGEscan DEG Overlap |
| 1%                       | >6.5                         | 181                   | 0                    | 1%                           | >7.25                        | 106                   | 5                    |
| 5%                       | >3.0                         | 591                   | 17                   | 5%                           | >3.0                         | 534                   | 19                   |
| 10%                      | >2.0                         | 1067                  | 34                   | 10%                          | >2.0                         | 1066                  | 55                   |
| 20%                      | >1.0                         | 2133                  | 74                   | 20%                          | >1.0                         | 2132                  | 105                  |

Comparison of nurse and forager HPG upregulated genes with their respective CAGEscan counterparts.

**Table S8:**

Adapters and barcodes used in nanoCAGE libraries.

Adapters ligated to the 5' end of the CAGE tags:

| <b>Strand</b> | <b>Sequence (5'-3')</b>           |
|---------------|-----------------------------------|
| 5' end        | <Barcode>NNNNNNNNTATA(rG)(rG)(rG) |

5' end barcodes used for nanoCAGE libraries:

| <b>Sample Name</b> | <b>NanoCAGE Library</b> | <b>Barcode</b> |
|--------------------|-------------------------|----------------|
| F14                | Forager                 | ACAGAT         |
| F27                |                         | ATCGTG         |
| F28                |                         | CACGAT         |
| F41                |                         | CACTGA         |
| F48                |                         | CTGACG         |
| F49                |                         | GAGTGA         |
| F50                |                         | GTATAC         |
| F54                |                         | TCGAGC         |
| N2                 |                         | Nurse          |
| N4                 | ATCGTG                  |                |
| N29                | CACGAT                  |                |
| N31                | CACTGA                  |                |
| N32                | CTGACG                  |                |
| N33                | GAGTGA                  |                |
| N41                | GTATAC                  |                |
| N42                | TCGAGC                  |                |



## **Supplementary Datasets**

**Supplementary Dataset 1.** List of 1,058 differentially expressed genes (DEGs) between nurses and foragers. 534 DEGs were upregulated in foragers and 524 DEGs were upregulated in nurses.

**Supplementary Dataset 2.** Similarity of DEGs between CAGEscan and previous studies.

**Supplementary Dataset 3.** Gene Ontology (GO) analysis based on the category-frequency of enriched GOs (using CateGORizer).

**Supplementary Dataset 4.** Gene Ontology (GO) analysis based on the frequency of GO terms associated with forager/nurse DEG list relative to genomic background using Fisher's exact test, followed by FDR correction for multiple testing ( $FDR < 0.05$ ).

**Supplementary Dataset 5.** List of 26 Transcription Factors were differentially expressed between nurses and foragers, with 4 and 22 upregulated TFs in each context, respectively. These TFs were identified as Key Regulators of Behavioral Maturation.

**Supplementary Dataset 6.** G/C content analysis for the promoters of DEGs.

**Supplementary Dataset 7.** Number of Forager DEG Genes whose promoters were enriched for motifs of TFs.

**Supplementary Dataset 8.** Distance Between nurse and forager TSS (bps) for all 1,058 DEGs.

**Supplementary Dataset 9.** Gene Ontology (GO) analysis of the 646 genes with alternative TSSs using (DAVID GO analysis tool).
